# Supplementary material for: Striatal Neurons Partially Expressing a Dopaminergic Phenotype: Functional Significance and Regulation
Source: MDPI journal article supplement (doi:10.3390/ijms231911054), 2022-09-21
Supplement: s1 [file s1]

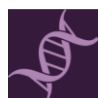

**Table S1.** Oligonucleotide primers used for PCR.

| Gene<br>designations by<br>NCBI database | Protein                                                                                     | Forward Primer               | Reverse Primer               |
|------------------------------------------|---------------------------------------------------------------------------------------------|------------------------------|------------------------------|
| Cyc1                                     | Cytochrome C                                                                                | 5'-GCGGCCAGGGAAGTTGT-3'      | 5'-GCCAGTGAGCAGGGAAAATAC-3'  |
| Th                                       | Tyrosine hydroxylase                                                                        | 5'-TCAGAGGAGCCCCGAGGTC-3'    | 5'-GGGCGCTGGATACGAGAG-3'     |
| Slc6a3                                   | Dopamine transporter                                                                        | 5'-CATCAACCCACCGCAGA-3'      | 5'-GAAGGCACCTCCACCATT-3'     |
| Ddc                                      | Aromatic L-amino acid<br>decarboxylase                                                      | 5'-TCCCCACGGCTAGCTCATACCC-3' | 5'-TTCCCCAGCCAGTCCATCATCA-3' |
| Drd1                                     | Dopamine receptor 1                                                                         | 5'-CTTTGGAGAGGGCAGCAGT-3'    | 5'-ACCCCCATGATCACAGACAGT-3'  |
| Drd2                                     | Dopamine receptor 2                                                                         | 5'-GAACAGGCGGAGAATGGA-3'     | 5'-GGATGGATCGGGGAGAGT-3'     |
| Nr4a2                                    | Nuclear receptor related 1                                                                  | 5'-CCGAAGAGCCACAGGAT-3'      | 5'-CCATAGAGCCGGTCAGGAG-3'    |
| Slc18a2                                  | Vesicular monoamine<br>transporter 2                                                        | 5'-ATTGGCTTTCCTTGGCTCAT-3'   | 5'-GGTACGGCTGGACATTATTCTG-3' |
| Slc18a1                                  | Vesicular monoamine<br>transporter 1                                                        | 5'-CCGGAAGCTGGTGTGGT-3'      | 5'-GAGAAGGCAGGAGAGGTGAGA-3'  |
| Slc7a5                                   | L-type amino acid<br>transporter 1                                                          | 5'-CTCCCGGTGTTCTTTATCCTG-3'  | 5'-AGAATCCACTTGGGCTTGTT-3'   |
| Gper1                                    | G protein-coupled<br>estrogen receptor 1                                                    | 5'-TCCGGGAGAAGATGACCA-3'     | 5'-GAGGAAGAAGACGCTGCTGTA-3'  |
| Paqr7                                    | Membrane progesterone<br>receptor alpha                                                     | 5'-GCGCTGGCCTATGTGCT-3'      | 5'-CTGCCGGGGAACCAACT-3'      |
| Sstr2                                    | Somatostatin receptor 2                                                                     | 5'-CATCCTGTACGCCTTCTGTCT-3'  | 5'-TCATTACGCCGGGATTTGT-3'    |
| Ednra                                    | Endothelin receptor type<br>A                                                               | 5'-GCCACAGCAGACTAAAATCAC-3'  | 5'-TGGGGCCGTTTCCTCATAC-3'    |
| Adra2c                                   | alpha 2C adrenoceptor                                                                       | 5'-CGTGTTCTGACTGTGCTGGTT-3'  | 5'-CGCCTGAAGTCCTGATTGAA-3'   |
| Gpr143                                   | G Protein-Coupled<br>Receptor 143 – L-DOPA<br>receptor                                      | 5'-CCCCAGGAAGGTTGTATGTGT-3'  | 5'-CTGGGCTTGGGAAATGGA-3'     |
| Nr3c2                                    | Nuclear receptor<br>subfamily 3 group C<br>member 2 –<br>mineralocorticosterone<br>receptor | 5'-GGGGGATTAAGCAAGAACC-3'    | 5'-GACAGGCGGAAAGGAAGTC-3'    |

NCBI, National Center for Biotechnology Information (<https://www.ncbi.nlm.nih.gov/gene>)
